# Supplementary material for: Synthesis of P(EGDMA-co-MAA)/P(EGDMA-co-VPy)/titania/polymer tetra-layer microspheres
Source: Royal Society of Chemistry journal article supplement (doi:10.1039/b9py00302a), 2010-01-01
Supplement: b9py00302a.pdf [file b9py00302a.pdf]

## Synthesis of P(EGDMA-*co*-MAA)/P(EGDMA-*co*-VPy)/Titania/Polymer

### Tetra-layer Microspheres

Longyu Li, Guangyu Liu, Xinlin Yang\*

*Key Laboratory of Functional Polymer Materials, the Ministry of Education, Institute of Polymer Chemistry, Nankai University, Tianjin 300071, China*

Figure S1: TEM micrographs

A: P(EGDMA-*co*-MAA)/titania composites;

B: P(EGDMA-*co*-MAA)@P(EGDMA-*co*-VPy)/titania microspheres.

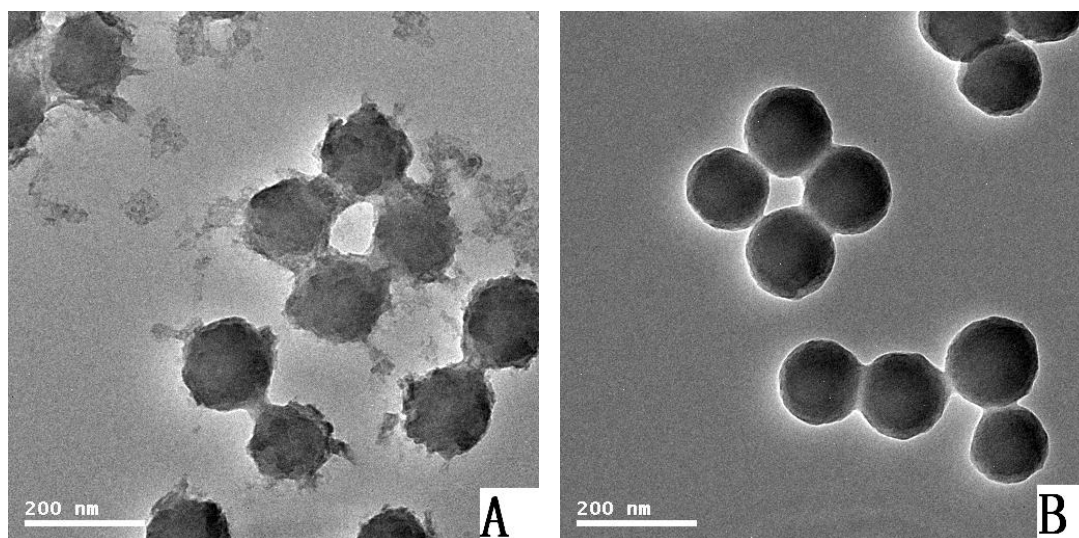

\* Corresponding author: Tel: +86-22-23502023, Fax: +86-22-23503510, E-mail: [xyang88@nankai.edu.cn](mailto:xyang88@nankai.edu.cn)
